# Supplementary material for: Supramolecular synthons in the gamma-hydroxybutenolides
Source: Royal Society of Chemistry journal article supplement (doi:10.1039/c7ce00953d), 2017-01-01
Supplement: c7ce00953d1.pdf [file c7ce00953d1.pdf]

## **Supramolecular Synthons in the Gamma-Hydroxybutenolides**

Margherita De Rosa,<sup>a,\*</sup> Pellegrino La Manna,<sup>a</sup> Annunziata Soriente,<sup>a</sup> Carmine Gaeta,<sup>a</sup> Carmen Talotta,<sup>a</sup>  
Neal Hickey,<sup>b,\*</sup> Silvano Geremia,<sup>b</sup> and Placido Neri<sup>a</sup>

<sup>a</sup>*Dipartimento di Chimica e Biologia "A. Zambelli", Università degli Studi di Salerno, Via Giovanni Paolo II 132, I-84084 Fisciano (Salerno), Italy.*

<sup>b</sup>*Centro di Eccellenza in Biocristallografia, Dipartimento di Scienze Chimiche e Farmaceutiche, Università di Trieste, via L. Giorgieri 1, 34127 Trieste, Italy.*

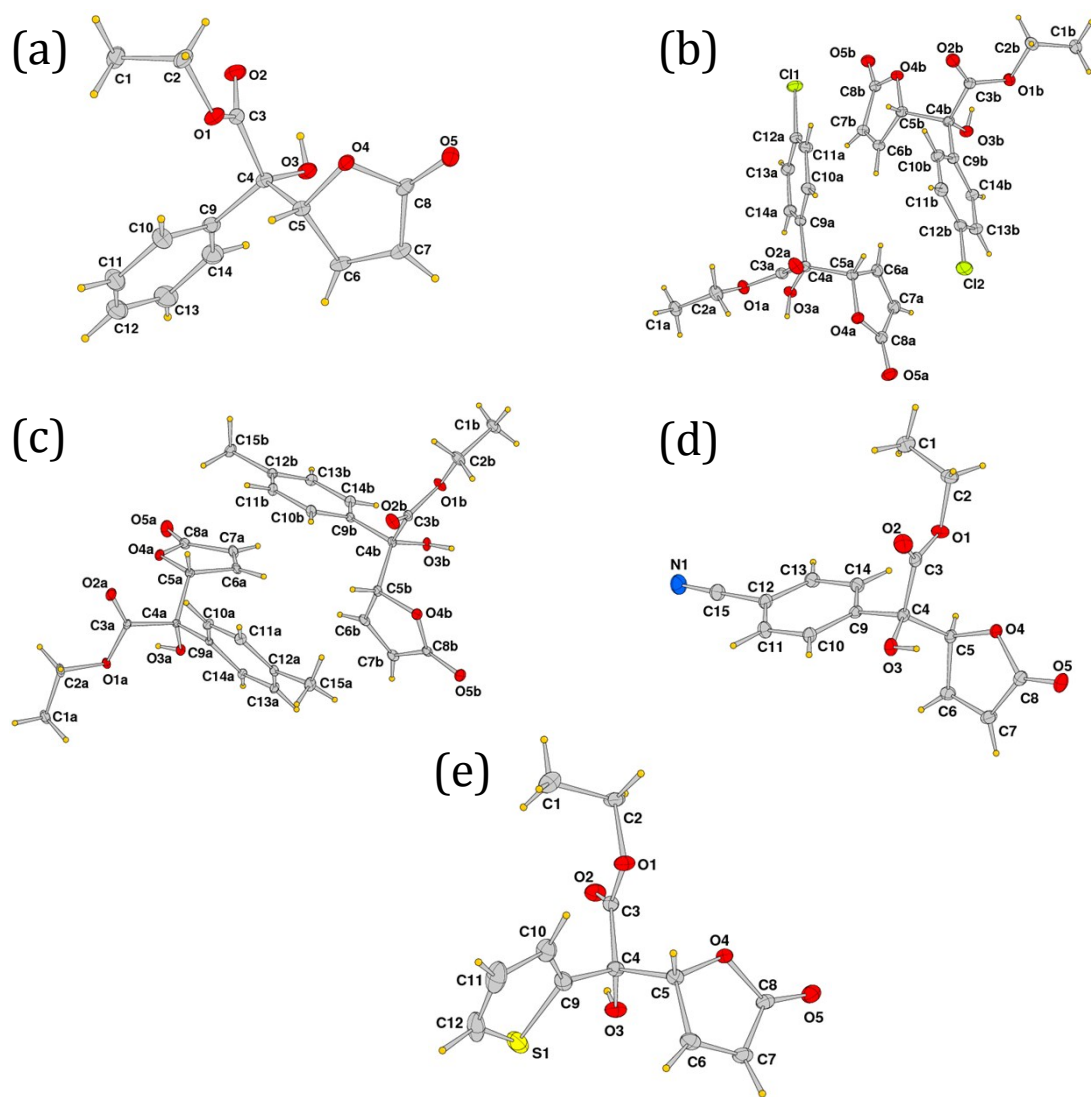

**Figure S1.** Ellipsoid plots at 50% probability for  $\gamma$ -hydroxybutenolides **3a** (a), **3b** (b), **3c** (c), **3d**(d) and **3e** (e).

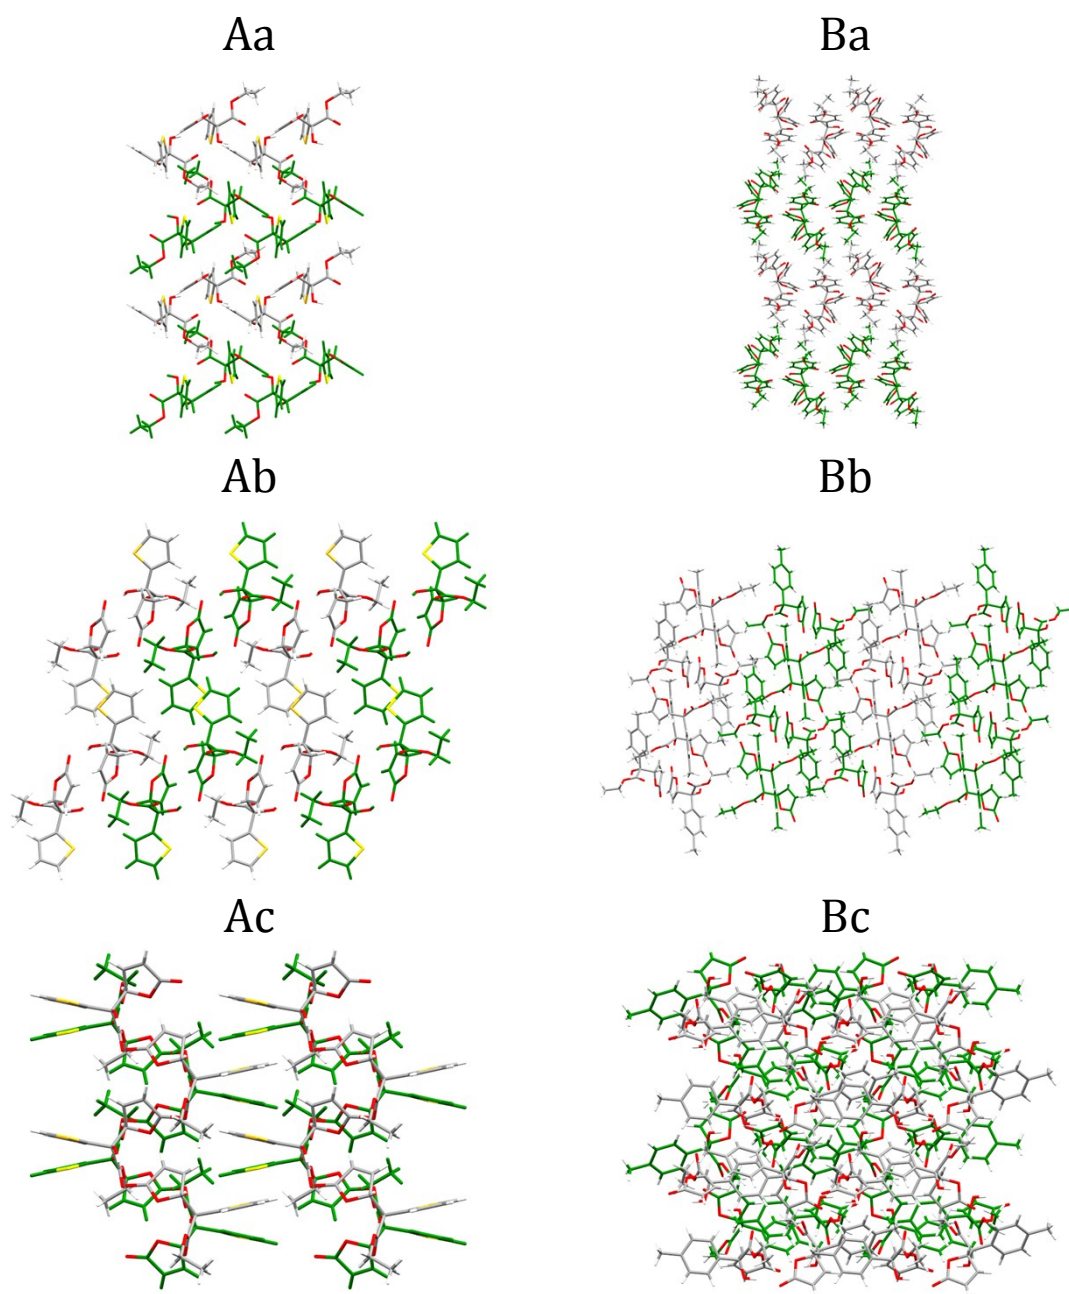

**Figure S2.** The packing arrangements of syn- $\gamma$ -hydroxybutenolide **3e** (A) and syn- $\gamma$ -hydroxybutenolide **3c** (B), as viewed along the a-axis (a), b-axis (b) and c-axis (c). Carbon atoms are represented in different colours (grey and green) to distinguish between the enantiomers.

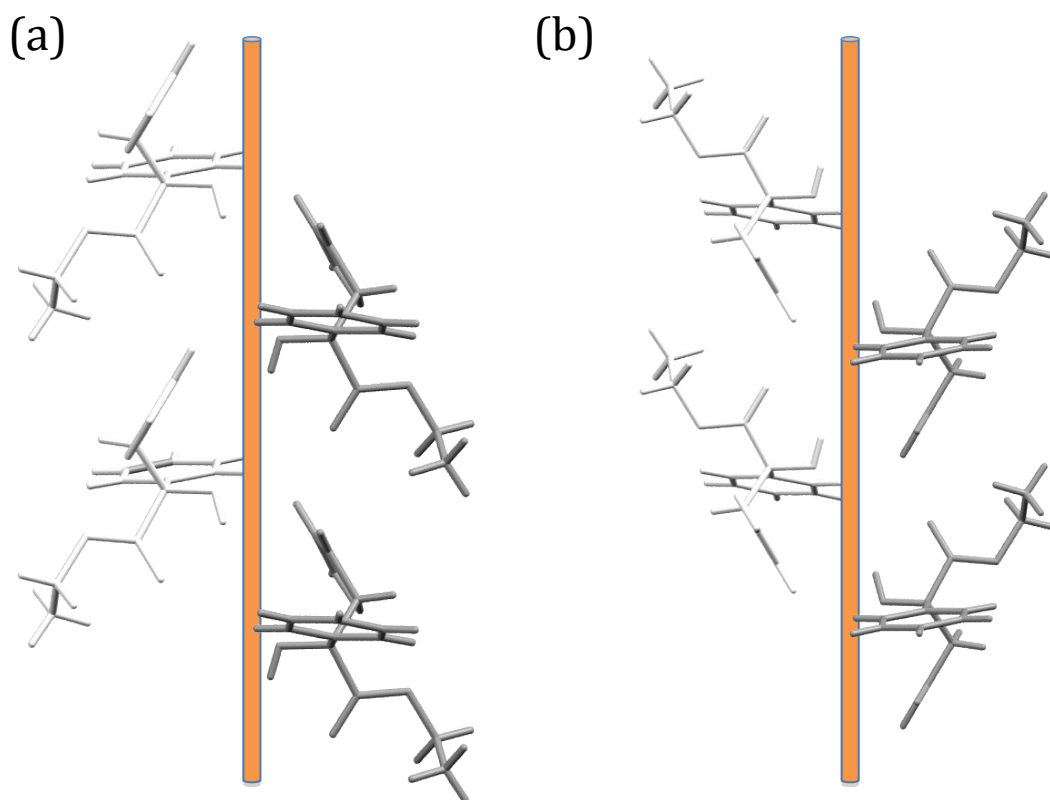

**Figure S3.** Handedness of  $2_1$  helices, on the basis of supramolecular-tilt-chirality (STC) proposed by Miyata and co-workers.<sup>1</sup> For clarity, molecules in front of the  $2_1$  screw axis (orange cylinder) are depicted entirely in a darker shade of grey with respect to those behind the axis. The handedness of the helix is determined by the direction the tilt of the molecule in front of the  $2_1$  axis. Thus, (a) represents a left-handed helix and (b) a right-handed helix.

<sup>1</sup>I. Hisaki, T. Sasaki, N. Tohnai, M. Miyata, *Chemistry - A European Journal*, 2012, **18**, 10066

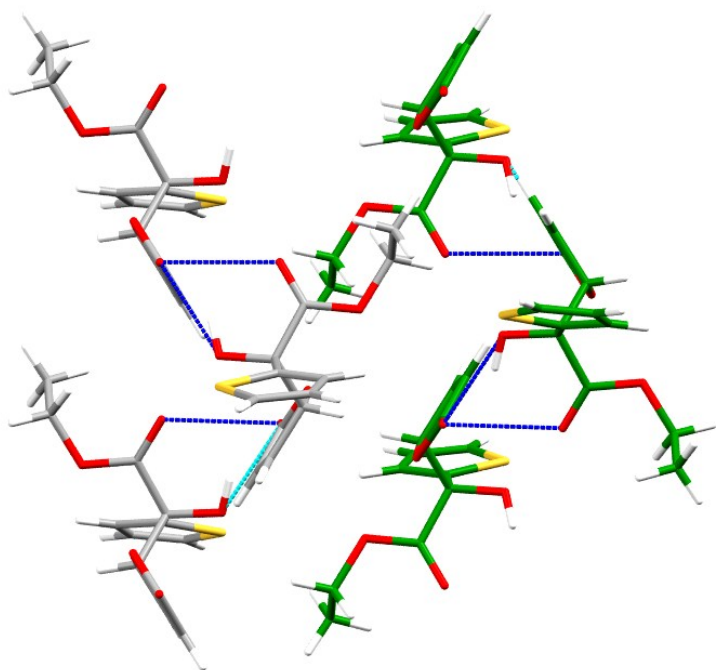

**Figure S4.** Helical arrangement, viewed down the *a*-axis, of the enantiomers around the  $2_1$  screw axis for *syn*- $\gamma$ -hydroxybutenolide **3e**. 3 molecules, representing a full turn, are shown for each enantiomer. The carbon atoms are depicted in grey and green to distinguish between the two enantiomorphous helices.

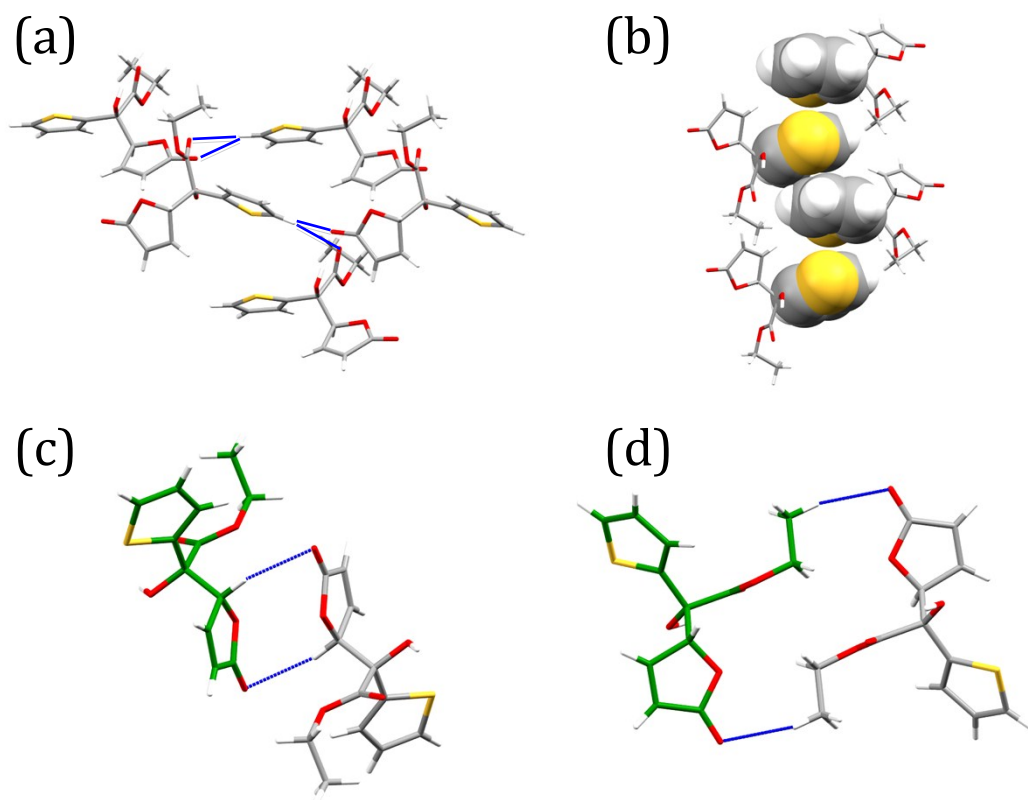

**Figure S5.** Overview of the weak non-covalent packing contacts in syn- $\gamma$ -hydroxybutenolide **3e**. (a) bridged C12H12...O2 / C12H12...O5 interactions between adjacent helical strands of molecules with the same chirality; (b) interlocking, zipper-like stacking of the phenyl rings which arises between adjacent helical strands of molecules with the same chirality; (c) reciprocal C7H7...O5 interactions between helical strands of different enantiomers; (d) reciprocal C1H1C...O5 interactions between helical strands of different enantiomers. The carbon atoms are depicted in grey and green to distinguish between the enantiomers.

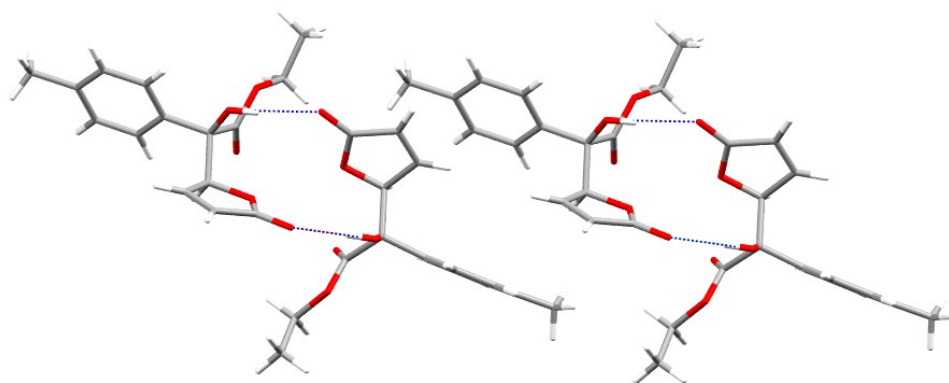

**Figure S6.** Homochiral dimers of syn—hydroxybutenolide **3c**.

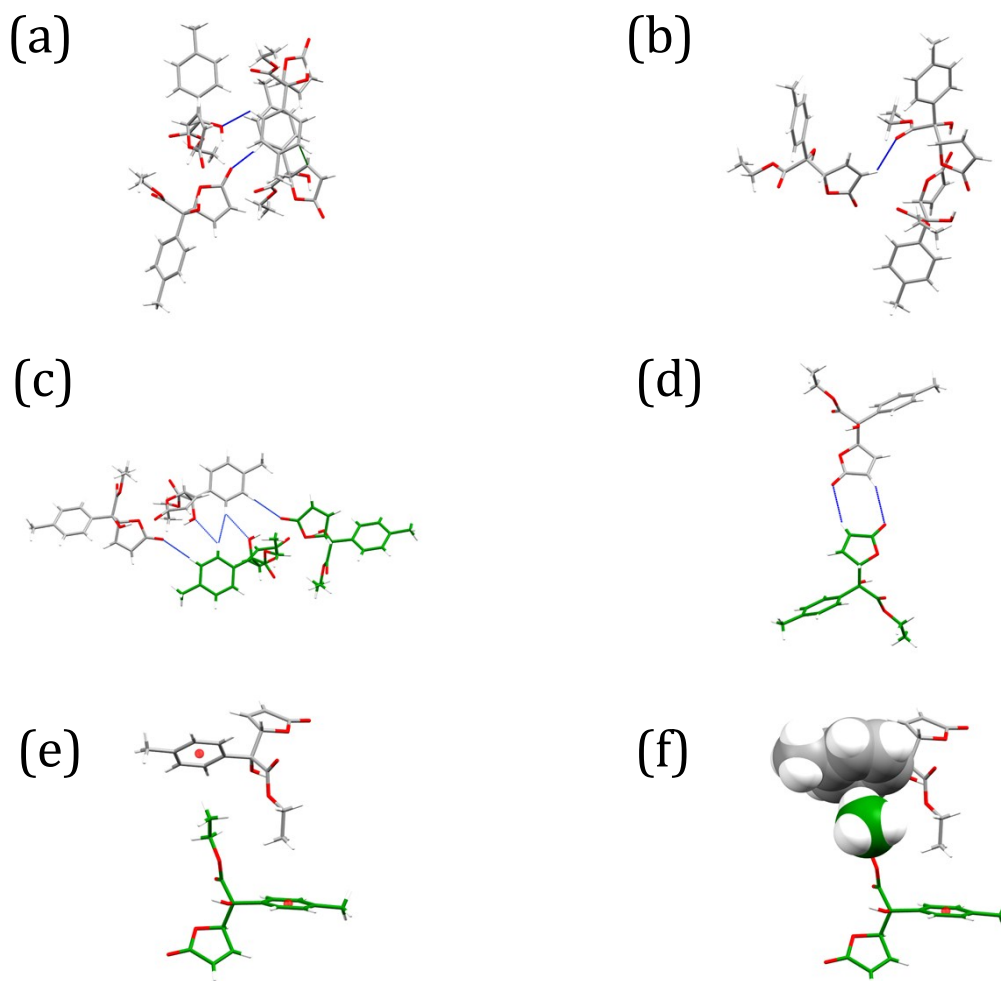

**Figure S7.** Overview of the weak, non-covalent packing contacts in *syn*- $\gamma$ -hydroxybutenolide **3c**. (a) network of interactions between the hydrogen bond oxygen atoms (O3A, O5B) of one dimer with aromatic hydrogens on two adjacent dimers; (b) interaction between the H7 butenolide hydrogen and the O2 carbonyl oxygen atom of an adjacent molecule; (c) reciprocal interactions between the hydrogen bond oxygen atoms (O3B, O5A) of one dimer with phenyl hydrogens on an adjacent molecule; (d) reciprocal interactions between a vinylic hydrogen and the carbonyl oxygen of two facing butenolide rings; (e) CH- $\pi$  interaction between a methyl hydrogen and a phenyl ring, with reciprocal CH $\cdots$ O interactions between a methyl hydrogen of the phenyl acceptor molecule and the O1 oxygen atom of the methyl donor molecule; (f) as in (e), with the CH- $\pi$  interaction shown as a space fill model. The carbon atoms are depicted in grey and green to distinguish between the enantiomers.



**Table S1. Crystallographic data for compound 3d**

|                                               |                                                  |
|-----------------------------------------------|--------------------------------------------------|
| CCDC code                                     | CCDC 1523707                                     |
| Formula                                       | C <sub>15</sub> H <sub>13</sub> N O <sub>5</sub> |
| Formula weight                                | 287.26                                           |
| Temperature (K)                               | 100                                              |
| Wavelength (Å)                                | 0.7                                              |
| Crystal system                                | Orthorhombico                                    |
| Space group                                   | Pn2 <sub>1</sub> a                               |
| a (Å)                                         | 10.2780 (3)                                      |
| b (Å)                                         | 10.4130 (16)                                     |
| c (Å)                                         | 12.405 0 (11)                                    |
| α (°)                                         | 90                                               |
| β (°)                                         | 90                                               |
| γ (°)                                         | 90                                               |
| V (Å <sup>3</sup> )                           | 1327.6 (2)                                       |
| Z, ρ <sub>calc</sub> (g.mm <sup>-3</sup> )    | 4, 1.437                                         |
| μ (mm <sup>-1</sup> )                         | 0.104                                            |
| F (000)                                       | 600                                              |
| Data collection θ range                       | 2.515 – 29.983                                   |
| Refl. Collected / unique                      | 24594 / 3912                                     |
| R <sub>int</sub>                              | 0.0269                                           |
| Completeness (%)                              | 96.3                                             |
| Refinement method <sup>a</sup>                | FMLS on F <sup>2</sup>                           |
| Data/Restraints/Parameters                    | 3912 / 0 / 193                                   |
| GooF                                          | 1.056                                            |
| R <sub>1</sub> , wR <sub>2</sub> [I>2σ(I)]    | 0.0277, 0.0764                                   |
| R <sub>1</sub> , wR <sub>2</sub> all data     | 0.0278, 0.0764                                   |
| ls shift su max/mean                          | 0.001 / 0                                        |
| Largest. Diff. peak/hole (e. Å <sup>3</sup> ) | 0.043 / -0.19                                    |
| Absoulte structure parameter (Flack)          | 0.03 (9)                                         |

<sup>a</sup>Full-matrix least-squares (FMLS) on F<sup>2</sup>
